# Supplementary material for: Low energy recycling of ionic liquids via freeze crystallization during cellulose spinning
Source: Royal Society of Chemistry journal article supplement (doi:10.1039/c7gc02880f), 2017-12-19
Supplement: c7gc02880f1.pdf [file c7gc02880f1.pdf]

## Electronic Supplementary Information

### Low energy recycling of ionic liquids via freeze crystallization during cellulose spinning

Yanrong Liu,<sup>a,b,c</sup> Anne S. Meyer,<sup>c</sup> Yi Nie,<sup>a</sup> Suojiang Zhang,<sup>\*a</sup> Kaj Thomsen<sup>\*b</sup>

<sup>a</sup>Beijing Key Laboratory of Ionic Liquids Clean Process, Key Laboratory of Green Process and Engineering, State Key Laboratory of Multiphase Complex Systems, Institute of Process Engineering, Chinese Academy of Sciences, P. O. Box 353, Beijing, 100190, China, E-mail: sjzhang@ipe.ac.cn.

<sup>b</sup>Center for Energy Resources Engineering (CERE), Department of Chemical and Biochemical Engineering, Technical University of Denmark, Søltofts Plads 229, 2800, Lyngby, Denmark, E-mail: kth@kt.dtu.dk.

<sup>c</sup>Center for Bioprocess Engineering, Department of Chemical and Biochemical Engineering, Technical University of Denmark, Søltofts Plads 227, 2800, Lyngby, Denmark, E-mail: am@kt.dtu.dk.

#### 1. EmimAc and EmimDep recycling processes by evaporation method

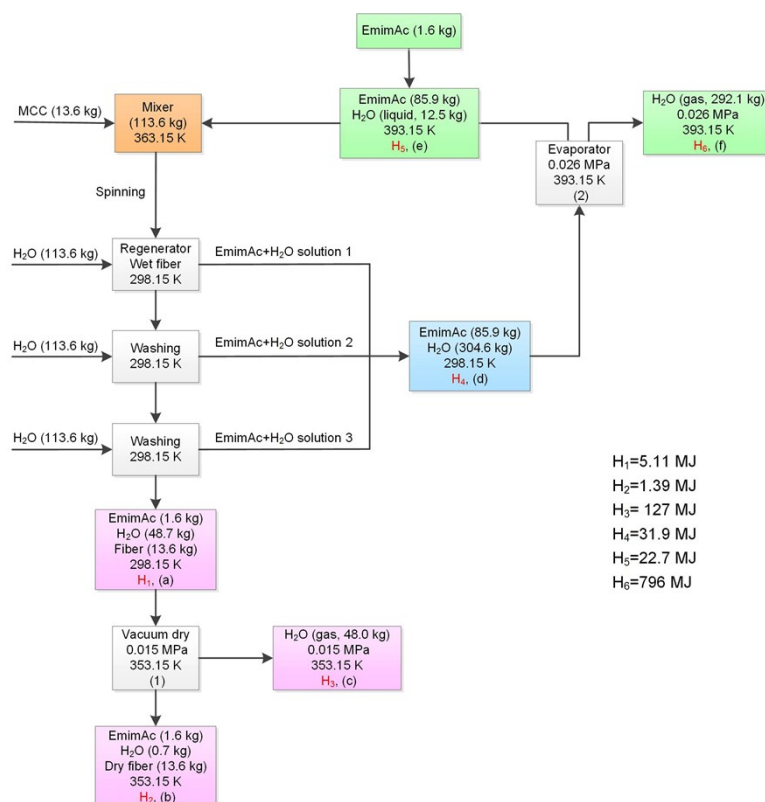

Figure 6 EmimAc recycling procedure in cellulose spinning process. H<sub>1</sub>-H<sub>8</sub> are the enthalpies of the

mixtures described in each box (a) to box (h).

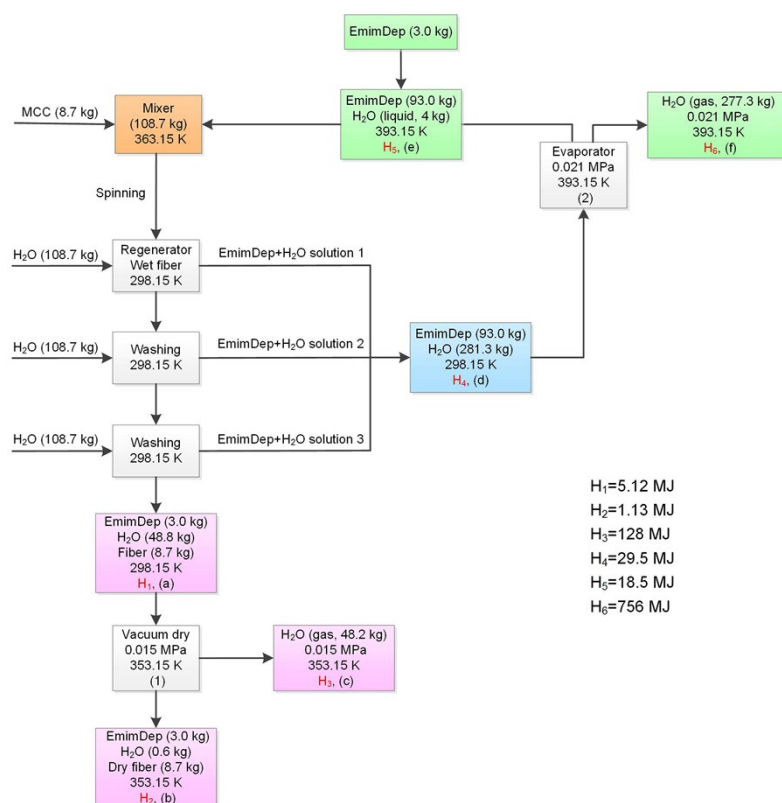

Figure 7 EmimDep recycling procedure in cellulose spinning process.  $H_1$ - $H_8$  are the enthalpies of the mixtures described in each box (a) to box (h).
